# Supplementary material
Source: PubMed Central journal article supplement (PMC1222622)
Supplement: bj3640725add.pdf [file bj3640725add.pdf]

**Human holo E-FABP**

| AA  | 500 MHz                           |                                   |       | 600 MHz                           |                                   |       | 800 MHz                           |                                   |       |
|-----|-----------------------------------|-----------------------------------|-------|-----------------------------------|-----------------------------------|-------|-----------------------------------|-----------------------------------|-------|
|     | R <sub>1</sub> [s <sup>-1</sup> ] | R <sub>2</sub> [s <sup>-1</sup> ] | NOE   | R <sub>1</sub> [s <sup>-1</sup> ] | R <sub>2</sub> [s <sup>-1</sup> ] | NOE   | R <sub>1</sub> [s <sup>-1</sup> ] | R <sub>2</sub> [s <sup>-1</sup> ] | NOE   |
| M1  |                                   |                                   |       |                                   |                                   |       |                                   |                                   |       |
| A2  |                                   |                                   |       |                                   |                                   |       |                                   |                                   |       |
| T3  | 1.587 ± 0.084                     | 3.734 ± 0.295                     | 0.468 | 1.312 ± 0.149                     | 7.687 ± 0.809                     | 0.797 | 1.062 ± 0.076                     | 8.169 ± 0.776                     | 0.716 |
| V4  | 1.724 ± 0.024                     | 10.325 ± 0.456                    | 0.834 | 1.375 ± 0.027                     | 12.039 ± 0.484                    | 0.820 | 0.998 ± 0.010                     | 14.972 ± 0.286                    | 0.815 |
| Q5  | 1.788 ± 0.046                     | 10.748 ± 0.214                    | 0.774 | 1.405 ± 0.031                     | 12.856 ± 0.175                    | 0.818 | 1.001 ± 0.014                     | 15.969 ± 0.316                    | 0.834 |
| Q6  | 1.708 ± 0.036                     | 9.878 ± 0.239                     | 0.767 | 1.422 ± 0.033                     | 11.939 ± 0.314                    | 0.823 | 1.015 ± 0.009                     | 14.580 ± 0.202                    | 0.850 |
| L7  | 1.781 ± 0.046                     | 10.218 ± 0.157                    | 0.837 | 1.383 ± 0.022                     | 11.812 ± 0.337                    | 0.806 | 0.972 ± 0.007                     | 14.485 ± 0.151                    | 0.836 |
| E8  | 1.642 ± 0.022                     | 10.425 ± 0.144                    | 0.777 | 1.356 ± 0.025                     | 11.767 ± 0.327                    | 0.797 | 0.952 ± 0.009                     | 14.535 ± 0.174                    | 0.849 |
| G9  | 1.681 ± 0.053                     | 9.494 ± 0.232                     | 0.800 | 1.283 ± 0.042                     | 10.988 ± 0.466                    | 0.819 | 0.951 ± 0.012                     | 14.115 ± 0.187                    | 0.832 |
| R10 | 1.734 ± 0.027                     | 10.834 ± 0.127                    | 0.784 | 1.281 ± 0.056                     | 12.091 ± 0.242                    | 0.800 | 0.915 ± 0.012                     | 15.055 ± 0.324                    | 0.825 |
| W11 | 1.692 ± 0.074                     | 9.275 ± 0.835                     | 0.846 | 1.371 ± 0.095                     | 11.454 ± 0.502                    | 0.796 | 0.966 ± 0.022                     | 14.311 ± 0.468                    | 0.878 |
| R12 | 1.678 ± 0.030                     | 9.864 ± 0.373                     | 0.769 | 1.313 ± 0.035                     | 10.857 ± 0.973                    | 0.769 | 0.927 ± 0.023                     | 14.187 ± 0.370                    | 0.829 |
| L13 | 1.776 ± 0.127                     | 10.109 ± 0.944                    |       | 1.432 ± 0.093                     | 10.586 ± 0.509                    | 0.829 | 1.049 ± 0.038                     | 14.819 ± 0.879                    | 0.949 |
| V14 |                                   |                                   |       |                                   |                                   |       |                                   |                                   |       |
| D15 | 1.661 ± 0.038                     | 10.085 ± 0.296                    | 0.716 | 1.331 ± 0.015                     | 11.445 ± 0.174                    | 0.783 | 0.962 ± 0.007                     | 13.815 ± 0.178                    | 0.825 |
| S16 | 1.569 ± 0.024                     | 9.491 ± 0.123                     | 0.739 | 1.231 ± 0.028                     | 10.611 ± 0.150                    | 0.791 | 0.884 ± 0.005                     | 12.691 ± 0.157                    | 0.857 |
| K17 | 1.636 ± 0.019                     | 10.172 ± 0.332                    | 0.833 | 1.291 ± 0.046                     | 11.776 ± 0.647                    | 0.778 | 0.931 ± 0.009                     | 14.987 ± 0.352                    | 0.838 |
| G18 | 1.700 ± 0.073                     | 10.555 ± 0.134                    | 0.770 | 1.422 ± 0.066                     | 11.167 ± 0.467                    | 0.807 | 0.994 ± 0.033                     | 13.784 ± 0.258                    | 0.831 |
| F19 | 1.775 ± 0.065                     | 11.152 ± 0.390                    | 0.807 | 1.407 ± 0.036                     | 12.353 ± 0.437                    | 0.787 | 0.949 ± 0.013                     | 14.500 ± 0.227                    | 0.870 |
| D20 | 1.868 ± 0.079                     | 10.760 ± 0.289                    | 0.771 | 1.529 ± 0.102                     | 11.431 ± 0.791                    | 0.906 | 1.105 ± 0.024                     | 14.781 ± 0.249                    | 0.859 |
| E21 | 1.758 ± 0.045                     | 10.243 ± 0.370                    | 0.840 | 1.345 ± 0.035                     | 11.215 ± 0.603                    | 0.844 | 0.935 ± 0.015                     | 14.040 ± 0.234                    | 0.886 |
| Y22 | 1.663 ± 0.177                     |                                   | 0.922 | 1.486 ± 0.067                     | 11.588 ± 0.709                    | 0.975 | 1.017 ± 0.026                     | 17.449 ± 0.897                    | 0.942 |
| M23 |                                   |                                   |       |                                   |                                   |       |                                   |                                   |       |
| K24 | 1.982 ± 0.121                     | 10.342 ± 0.386                    | 0.724 | 1.319 ± 0.061                     | 11.742 ± 0.779                    | 0.863 | 1.017 ± 0.025                     | 13.925 ± 0.282                    | 0.857 |
| E25 | 1.811 ± 0.037                     | 10.418 ± 0.139                    | 0.763 | 1.391 ± 0.053                     | 11.781 ± 0.985                    | 0.839 | 0.981 ± 0.008                     | 15.687 ± 0.224                    | 0.866 |
| L26 | 1.681 ± 0.023                     | 10.478 ± 0.327                    | 0.801 | 1.333 ± 0.037                     | 11.535 ± 0.564                    | 0.850 | 0.949 ± 0.011                     | 14.244 ± 0.149                    | 0.864 |
| G27 | 1.673 ± 0.023                     | 9.806 ± 0.193                     | 0.831 | 1.383 ± 0.032                     | 11.476 ± 0.553                    | 0.815 | 0.952 ± 0.014                     | 14.112 ± 0.219                    | 0.837 |
| V28 | 1.649 ± 0.066                     | 11.009 ± 0.530                    | 0.854 | 1.296 ± 0.091                     | 12.132 ± 0.606                    | 0.941 | 0.987 ± 0.017                     | 17.002 ± 0.204                    | 0.826 |
| G29 | 1.687 ± 0.036                     | 9.910 ± 0.144                     | 0.726 | 1.303 ± 0.032                     | 11.525 ± 0.602                    | 0.813 | 0.976 ± 0.010                     | 14.577 ± 0.270                    | 0.780 |
| I30 | 1.694 ± 0.045                     | 9.550 ± 0.224                     | 0.675 | 1.294 ± 0.036                     | 10.284 ± 0.424                    | 0.819 | 0.960 ± 0.024                     | 15.294 ± 0.805                    | 0.850 |
| A31 | 1.822 ± 0.016                     | 10.682 ± 0.157                    | 0.722 | 1.488 ± 0.017                     | 11.438 ± 0.179                    | 0.812 | 1.076 ± 0.009                     | 14.464 ± 0.179                    | 0.823 |
| L32 | 1.576 ± 0.038                     | 9.933 ± 0.206                     | 0.728 | 1.308 ± 0.039                     | 11.391 ± 0.417                    | 0.754 | 0.893 ± 0.017                     | 13.767 ± 0.229                    | 0.806 |
| R33 | 1.658 ± 0.030                     | 8.771 ± 0.487                     | 0.719 | 1.374 ± 0.043                     | 12.537 ± 1.223                    | 0.739 | 0.984 ± 0.026                     | 15.008 ± 0.428                    | 0.800 |
| K34 |                                   |                                   |       |                                   |                                   |       |                                   |                                   |       |
| M35 | 1.598 ± 0.045                     | 10.083 ± 0.129                    | 0.770 | 1.265 ± 0.055                     | 11.522 ± 0.459                    | 0.811 | 0.925 ± 0.015                     | 14.157 ± 0.218                    | 0.791 |
| G36 | 1.614 ± 0.061                     | 10.295 ± 0.477                    | 0.762 | 1.469 ± 0.069                     | 12.198 ± 0.854                    | 0.820 | 1.002 ± 0.034                     | 15.160 ± 0.323                    | 0.815 |

| AA  | 500 MHz                           |                                   |       | 600 MHz                           |                                   |       | 800 MHz                           |                                   |       |
|-----|-----------------------------------|-----------------------------------|-------|-----------------------------------|-----------------------------------|-------|-----------------------------------|-----------------------------------|-------|
|     | R <sub>1</sub> [s <sup>-1</sup> ] | R <sub>2</sub> [s <sup>-1</sup> ] | NOE   | R <sub>1</sub> [s <sup>-1</sup> ] | R <sub>2</sub> [s <sup>-1</sup> ] | NOE   | R <sub>1</sub> [s <sup>-1</sup> ] | R <sub>2</sub> [s <sup>-1</sup> ] | NOE   |
| A37 | 1.729 ± 0.076                     | 10.498 ± 0.822                    | 0.804 | 1.313 ± 0.040                     | 12.158 ± 0.355                    | 0.821 | 0.996 ± 0.008                     | 15.221 ± 0.266                    | 0.839 |
| M38 | 1.638 ± 0.068                     | 9.079 ± 0.395                     | 0.702 | 1.289 ± 0.071                     | 10.091 ± 0.428                    | 0.692 | 0.940 ± 0.013                     | 12.953 ± 0.375                    | 0.744 |
| A39 | 1.666 ± 0.082                     | 10.106 ± 0.446                    | 0.635 | 1.301 ± 0.067                     | 11.312 ± 0.214                    | 0.772 | 0.923 ± 0.016                     | 13.923 ± 0.202                    | 0.794 |
| K40 | 1.761 ± 0.229                     | 8.333 ± 0.636                     | 0.677 | 1.327 ± 0.170                     | 11.895 ± 0.775                    | 0.722 | 0.950 ± 0.051                     | 12.115 ± 0.338                    | 0.759 |
| P41 |                                   |                                   |       |                                   |                                   |       |                                   |                                   |       |
| D42 | 1.740 ± 0.023                     | 9.942 ± 0.270                     | 0.747 | 1.361 ± 0.044                     | 11.697 ± 0.189                    | 0.867 | 0.922 ± 0.009                     | 14.125 ± 0.199                    | 0.835 |
| C43 | 1.849 ± 0.115                     | 10.011 ± 0.339                    | 0.766 | 1.250 ± 0.066                     | 11.039 ± 0.655                    | 0.799 | 0.915 ± 0.016                     | 13.724 ± 0.135                    | 0.831 |
| I44 | 1.693 ± 0.055                     | 10.159 ± 0.329                    | 0.755 | 1.437 ± 0.091                     | 10.857 ± 0.654                    | 0.734 | 0.940 ± 0.035                     | 14.468 ± 0.515                    | 0.877 |
| I45 | 1.688 ± 0.035                     | 10.104 ± 0.214                    | 0.831 | 1.405 ± 0.058                     | 11.618 ± 0.897                    | 0.827 | 0.907 ± 0.009                     | 14.422 ± 0.154                    | 0.847 |
| T46 | 1.690 ± 0.044                     | 10.481 ± 0.342                    | 0.839 | 1.375 ± 0.045                     | 12.073 ± 0.609                    | 0.773 | 0.915 ± 0.013                     | 14.718 ± 0.356                    | 0.839 |
| C47 | 1.733 ± 0.034                     | 9.621 ± 0.138                     | 0.783 | 1.289 ± 0.022                     | 10.436 ± 0.195                    | 0.784 | 0.906 ± 0.008                     | 13.595 ± 0.261                    | 0.825 |
| D48 |                                   |                                   |       | 1.516 ± 0.044                     | 12.595 ± 0.648                    | 0.842 | 0.984 ± 0.014                     | 14.353 ± 0.363                    | 0.860 |
| G49 | 1.688 ± 0.050                     | 10.135 ± 0.202                    | 0.790 | 1.369 ± 0.044                     | 10.995 ± 0.341                    | 0.823 | 0.957 ± 0.013                     | 14.521 ± 0.238                    | 0.848 |
| K50 | 1.718 ± 0.085                     | 9.409 ± 0.561                     | 0.730 | 1.388 ± 0.043                     | 10.667 ± 0.317                    | 0.803 | 1.007 ± 0.009                     | 13.206 ± 0.215                    | 0.813 |
| N51 | 1.644 ± 0.037                     | 9.861 ± 0.253                     | 0.783 | 1.284 ± 0.047                     | 11.011 ± 0.439                    | 0.752 | 0.899 ± 0.009                     | 13.788 ± 0.178                    | 0.809 |
| L52 | 1.691 ± 0.058                     | 9.649 ± 0.315                     | 0.788 | 1.304 ± 0.037                     | 11.168 ± 0.482                    | 0.788 | 0.929 ± 0.018                     | 13.909 ± 0.170                    | 0.861 |
| T53 | 1.727 ± 0.048                     | 10.531 ± 0.278                    | 0.767 | 1.342 ± 0.033                     | 11.704 ± 0.301                    | 0.802 | 0.919 ± 0.011                     | 14.266 ± 0.188                    | 0.883 |
| I54 | 1.836 ± 0.103                     | 10.774 ± 0.255                    | 0.737 | 1.268 ± 0.040                     | 11.424 ± 0.469                    | 0.814 | 0.926 ± 0.010                     | 14.433 ± 0.195                    | 0.852 |
| K55 | 1.778 ± 0.061                     | 11.049 ± 0.928                    | 0.746 | 1.475 ± 0.107                     | 10.776 ± 1.086                    | 0.789 | 1.011 ± 0.028                     | 14.114 ± 0.682                    | 0.864 |
| T56 | 1.658 ± 0.060                     | 9.321 ± 0.410                     | 0.903 | 1.337 ± 0.087                     | 11.509 ± 0.665                    | 0.808 | 0.937 ± 0.021                     | 14.187 ± 0.554                    | 0.865 |
| E57 | 1.734 ± 0.123                     | 10.528 ± 0.799                    | 0.701 | 1.356 ± 0.132                     | 10.515 ± 0.791                    | 0.836 | 0.946 ± 0.047                     | 13.960 ± 0.401                    | 0.762 |
| S58 | 1.672 ± 0.088                     | 8.371 ± 0.607                     | 0.647 | 1.443 ± 0.111                     | 10.097 ± 1.077                    | 0.783 | 0.981 ± 0.025                     | 13.078 ± 0.503                    | 0.767 |
| T59 |                                   |                                   |       |                                   |                                   |       |                                   |                                   |       |
| L60 |                                   |                                   |       |                                   |                                   |       |                                   |                                   |       |
| K61 | 1.695 ± 0.066                     | 8.190 ± 0.480                     | 0.690 | 1.333 ± 0.064                     | 9.699 ± 0.850                     | 0.717 | 1.007 ± 0.012                     | 12.456 ± 0.186                    | 0.758 |
| T62 | 1.858 ± 0.089                     | 9.815 ± 0.662                     | 0.683 | 1.535 ± 0.073                     | 10.957 ± 0.598                    | 0.831 | 1.095 ± 0.037                     | 13.715 ± 0.547                    | 0.768 |
| T63 | 1.553 ± 0.145                     | 9.251 ± 0.814                     | 0.629 | 1.246 ± 0.082                     | 11.964 ± 0.936                    | 0.844 | 1.009 ± 0.031                     | 13.733 ± 0.257                    | 0.807 |
| Q64 | 1.879 ± 0.146                     | 10.787 ± 0.497                    | 0.660 | 1.502 ± 0.070                     | 12.565 ± 0.788                    | 0.747 | 1.016 ± 0.063                     | 14.382 ± 0.282                    | 0.836 |
| F65 | 1.829 ± 0.062                     | 10.502 ± 0.377                    | 0.820 | 1.370 ± 0.036                     | 11.927 ± 0.330                    | 0.824 | 0.989 ± 0.017                     | 14.913 ± 0.376                    | 0.888 |
| S66 |                                   |                                   |       |                                   |                                   |       |                                   |                                   |       |
| C67 | 1.682 ± 0.064                     | 10.413 ± 0.201                    | 0.727 | 1.361 ± 0.045                     | 11.821 ± 0.507                    | 0.831 | 0.957 ± 0.011                     | 14.643 ± 0.243                    | 0.851 |
| T68 | 1.702 ± 0.033                     | 10.159 ± 0.301                    | 0.803 | 1.267 ± 0.053                     | 11.575 ± 0.480                    | 0.779 | 0.895 ± 0.012                     | 14.518 ± 0.300                    | 0.860 |
| L69 | 1.668 ± 0.044                     | 10.232 ± 0.400                    | 0.773 | 1.395 ± 0.042                     | 11.458 ± 0.503                    | 0.877 | 0.966 ± 0.016                     | 15.176 ± 0.338                    | 0.863 |
| G70 | 1.660 ± 0.061                     | 10.158 ± 0.226                    | 0.734 | 1.328 ± 0.061                     | 10.610 ± 0.562                    | 0.840 | 0.938 ± 0.022                     | 14.723 ± 0.267                    | 0.840 |
| E71 | 1.759 ± 0.026                     | 10.177 ± 0.201                    | 0.822 | 1.353 ± 0.023                     | 11.113 ± 0.266                    | 0.793 | 0.987 ± 0.011                     | 14.146 ± 0.108                    | 0.862 |
| K72 |                                   |                                   |       |                                   |                                   |       |                                   |                                   |       |
| F73 | 1.759 ± 0.059                     | 10.205 ± 0.312                    | 0.760 | 1.428 ± 0.043                     | 10.915 ± 0.424                    | 0.768 | 1.023 ± 0.011                     | 14.162 ± 0.213                    | 0.851 |

| AA   | 500 MHz                           |                                   |       | 600 MHz                           |                                   |       | 800 MHz                           |                                   |       |
|------|-----------------------------------|-----------------------------------|-------|-----------------------------------|-----------------------------------|-------|-----------------------------------|-----------------------------------|-------|
|      | R <sub>1</sub> [s <sup>-1</sup> ] | R <sub>2</sub> [s <sup>-1</sup> ] | NOE   | R <sub>1</sub> [s <sup>-1</sup> ] | R <sub>2</sub> [s <sup>-1</sup> ] | NOE   | R <sub>1</sub> [s <sup>-1</sup> ] | R <sub>2</sub> [s <sup>-1</sup> ] | NOE   |
| E74  | 1.621 ± 0.026                     | 9.579 ± 0.144                     | 0.744 | 1.324 ± 0.024                     | 11.015 ± 0.221                    | 0.798 | 0.921 ± 0.009                     | 13.238 ± 0.087                    | 0.841 |
| E75  | 1.745 ± 0.049                     | 9.828 ± 0.339                     | 0.753 | 1.410 ± 0.048                     | 12.718 ± 0.776                    | 0.795 | 0.998 ± 0.018                     | 14.080 ± 0.691                    | 0.831 |
| T76  | 1.841 ± 0.106                     | 9.555 ± 0.423                     | 0.738 | 1.281 ± 0.073                     | 11.095 ± 0.461                    | 0.825 | 0.878 ± 0.010                     | 13.919 ± 0.276                    | 0.824 |
| T77  | 1.650 ± 0.058                     | 10.548 ± 0.253                    | 0.875 | 1.354 ± 0.052                     | 12.079 ± 0.503                    | 0.806 | 0.967 ± 0.015                     | 14.859 ± 0.336                    | 0.862 |
| A78  | 1.778 ± 0.089                     | 10.131 ± 0.455                    | 0.827 | 1.388 ± 0.046                     | 10.710 ± 0.958                    | 0.805 | 0.976 ± 0.041                     | 14.471 ± 0.605                    | 0.892 |
| D79  | 1.768 ± 0.076                     | 10.417 ± 0.658                    | 0.764 | 1.406 ± 0.123                     | 12.575 ± 0.778                    | 0.788 | 1.000 ± 0.068                     | 15.503 ± 0.733                    | 0.842 |
| G80  | 1.555 ± 0.046                     | 10.115 ± 0.445                    | 0.815 | 1.297 ± 0.051                     | 11.632 ± 0.636                    | 0.803 | 0.924 ± 0.021                     | 15.813 ± 0.166                    | 0.849 |
| R81  | 1.651 ± 0.037                     | 9.795 ± 0.357                     | 0.744 | 1.259 ± 0.049                     | 11.581 ± 0.494                    | 0.762 | 0.950 ± 0.011                     | 14.822 ± 0.149                    | 0.868 |
| K82  | 1.660 ± 0.049                     | 9.909 ± 0.210                     | 0.828 | 1.195 ± 0.042                     | 11.320 ± 0.495                    | 0.836 | 0.835 ± 0.005                     | 14.564 ± 0.476                    | 0.847 |
| T83  | 1.630 ± 0.029                     | 9.818 ± 0.139                     | 0.766 | 1.280 ± 0.033                     | 11.137 ± 0.422                    | 0.791 | 0.903 ± 0.006                     | 13.558 ± 0.198                    | 0.849 |
| Q84  | 1.633 ± 0.036                     | 10.360 ± 0.225                    | 0.798 | 1.324 ± 0.046                     | 11.602 ± 0.383                    | 0.819 | 0.937 ± 0.011                     | 14.227 ± 0.341                    | 0.850 |
| T85  | 1.740 ± 0.107                     | 9.728 ± 0.384                     | 0.702 | 1.404 ± 0.041                     | 10.746 ± 0.426                    | 0.796 | 0.963 ± 0.014                     | 13.811 ± 0.277                    | 0.874 |
| V86  | 1.588 ± 0.059                     | 11.298 ± 0.373                    | 0.737 | 1.455 ± 0.070                     | 10.489 ± 0.500                    | 0.811 | 1.024 ± 0.023                     | 15.237 ± 0.687                    | 0.858 |
| C87  | 1.718 ± 0.074                     | 9.385 ± 0.316                     | 0.734 | 1.292 ± 0.068                     | 10.135 ± 0.595                    | 0.813 | 0.928 ± 0.014                     | 13.586 ± 0.235                    | 0.863 |
| N88  | 1.702 ± 0.038                     | 9.982 ± 0.284                     | 0.745 | 1.310 ± 0.027                     | 11.391 ± 0.344                    | 0.835 | 0.881 ± 0.005                     | 14.083 ± 0.129                    | 0.843 |
| F89  | 1.571 ± 0.026                     | 9.297 ± 0.127                     | 0.755 | 1.283 ± 0.029                     | 10.617 ± 0.118                    | 0.789 | 0.929 ± 0.010                     | 13.356 ± 0.195                    | 0.832 |
| T90  | 1.609 ± 0.054                     | 9.915 ± 0.151                     | 0.804 | 1.299 ± 0.028                     | 11.032 ± 0.269                    | 0.809 | 0.902 ± 0.010                     | 13.475 ± 0.146                    | 0.834 |
| D91  | 1.829 ± 0.133                     | 9.414 ± 0.742                     | 0.804 | 1.397 ± 0.089                     | 11.124 ± 0.705                    | 0.798 | 0.998 ± 0.047                     | 13.825 ± 0.355                    | 0.803 |
| G92  | 1.599 ± 0.027                     | 9.310 ± 0.219                     | 0.744 | 1.324 ± 0.037                     | 10.945 ± 0.518                    | 0.811 | 0.953 ± 0.025                     | 14.219 ± 0.384                    | 0.817 |
| A93  | 1.725 ± 0.029                     | 10.016 ± 0.287                    | 0.786 | 1.360 ± 0.024                     | 11.401 ± 0.194                    | 0.796 | 0.998 ± 0.006                     | 14.482 ± 0.151                    | 0.798 |
| L94  | 1.761 ± 0.051                     | 10.273 ± 0.366                    | 0.852 | 1.320 ± 0.063                     | 11.604 ± 0.181                    | 0.856 | 0.934 ± 0.009                     | 14.287 ± 0.113                    | 0.861 |
| V95  | 1.753 ± 0.050                     | 11.677 ± 0.352                    | 0.815 | 1.294 ± 0.028                     | 13.704 ± 0.520                    | 0.835 | 0.924 ± 0.015                     | 18.454 ± 0.307                    | 0.900 |
| Q96  |                                   |                                   |       |                                   |                                   |       |                                   |                                   |       |
| H97  | 1.791 ± 0.078                     | 10.914 ± 0.395                    | 0.741 | 1.392 ± 0.074                     | 11.302 ± 0.345                    | 0.830 | 0.957 ± 0.010                     | 15.344 ± 0.341                    | 0.873 |
| Q98  | 1.661 ± 0.052                     | 9.698 ± 0.279                     | 0.772 | 1.356 ± 0.051                     | 10.702 ± 0.568                    | 0.821 | 0.937 ± 0.018                     | 13.698 ± 0.246                    | 0.877 |
| E99  | 1.558 ± 0.043                     | 10.208 ± 0.320                    | 0.771 | 1.304 ± 0.043                     | 10.914 ± 0.256                    | 0.765 | 0.905 ± 0.018                     | 13.430 ± 0.211                    | 0.833 |
| W100 | 1.670 ± 0.039                     | 10.622 ± 0.189                    | 0.766 | 1.422 ± 0.033                     | 10.208 ± 0.342                    | 0.898 | 0.961 ± 0.012                     | 13.873 ± 0.229                    | 0.883 |
| D101 | 1.706 ± 0.026                     | 9.650 ± 0.271                     | 0.788 | 1.351 ± 0.022                     | 11.246 ± 0.244                    | 0.811 | 0.955 ± 0.008                     | 13.521 ± 0.129                    | 0.831 |
| G102 | 1.623 ± 0.029                     | 9.959 ± 0.192                     | 0.742 | 1.328 ± 0.029                     | 11.699 ± 0.132                    | 0.807 | 0.943 ± 0.011                     | 13.821 ± 0.131                    | 0.825 |
| K103 |                                   |                                   |       |                                   |                                   |       |                                   |                                   |       |
| E104 | 1.543 ± 0.024                     | 9.093 ± 0.143                     | 0.728 | 1.275 ± 0.021                     | 10.439 ± 0.397                    | 0.773 | 0.897 ± 0.004                     | 12.394 ± 0.330                    | 0.809 |
| S105 | 1.768 ± 0.059                     | 9.892 ± 0.231                     | 0.839 | 1.324 ± 0.023                     | 11.429 ± 0.363                    | 0.803 | 0.929 ± 0.011                     | 13.637 ± 0.224                    | 0.867 |
| T106 |                                   |                                   |       |                                   |                                   |       |                                   |                                   |       |
| I107 | 1.832 ± 0.073                     | 9.569 ± 0.515                     | 0.645 | 1.313 ± 0.071                     | 11.026 ± 0.952                    | 0.855 | 0.935 ± 0.035                     | 14.227 ± 0.380                    | 0.840 |
| T108 | 1.722 ± 0.033                     | 10.861 ± 0.282                    | 0.791 | 1.337 ± 0.044                     | 12.272 ± 0.536                    | 0.840 | 0.925 ± 0.013                     | 16.747 ± 0.236                    | 0.865 |
| R109 | 1.691 ± 0.090                     | 10.355 ± 0.362                    | 0.764 | 1.350 ± 0.064                     | 11.452 ± 0.584                    | 0.752 | 0.888 ± 0.019                     | 14.636 ± 0.401                    | 0.841 |
| K110 | 1.728 ± 0.020                     | 10.368 ± 0.214                    | 0.746 | 1.304 ± 0.030                     | 12.250 ± 0.590                    | 0.833 | 0.905 ± 0.012                     | 15.124 ± 0.217                    | 0.853 |

| AA   | 500 MHz                           |                                   |       | 600 MHz                           |                                   |       | 800 MHz                           |                                   |       |
|------|-----------------------------------|-----------------------------------|-------|-----------------------------------|-----------------------------------|-------|-----------------------------------|-----------------------------------|-------|
|      | R <sub>1</sub> [s <sup>-1</sup> ] | R <sub>2</sub> [s <sup>-1</sup> ] | NOE   | R <sub>1</sub> [s <sup>-1</sup> ] | R <sub>2</sub> [s <sup>-1</sup> ] | NOE   | R <sub>1</sub> [s <sup>-1</sup> ] | R <sub>2</sub> [s <sup>-1</sup> ] | NOE   |
| L111 | 1.565 ± 0.032                     | 10.062 ± 0.107                    | 0.682 | 1.301 ± 0.024                     | 11109 ± 0.232                     | 0.760 | 0.933 ± 0.006                     | 11.717 ± 0.405                    | 0.745 |
| K112 | 1.695 ± 0.030                     | 9.586 ± 0.183                     | 0.729 | 1.325 ± 0.025                     | 10.770 ± 0.162                    | 0.796 | 0.934 ± 0.016                     | 13.098 ± 0.457                    | 0.823 |
| D113 | 1.741 ± 0.116                     | 10.429 ± 0.441                    | 0.761 | 1.362 ± 0.092                     | 11.125 ± 0.614                    | 0.816 | 0.981 ± 0.039                     | 14.557 ± 0.381                    | 0.822 |
| G114 | 1.619 ± 0.026                     | 9.923 ± 0.177                     | 0.743 | 1.332 ± 0.054                     | 11.006 ± 0.250                    | 0.790 | 0.951 ± 0.016                     | 13.520 ± 0.118                    | 0.824 |
| K115 |                                   |                                   |       |                                   |                                   |       |                                   |                                   |       |
| L116 | 1.728 ± 0.049                     | 10.173 ± 0.257                    | 0.821 | 1.372 ± 0.076                     | 11.610 ± 0.302                    | 0.799 | 0.929 ± 0.018                     | 13.877 ± 0.097                    | 0.867 |
| V117 | 1.658 ± 0.034                     | 10.164 ± 0.294                    | 0.753 | 1.307 ± 0.044                     | 12.177 ± 0.339                    | 0.823 | 0.909 ± 0.014                     | 15.108 ± 0.226                    | 0.865 |
| V118 | 1.783 ± 0.042                     | 10.181 ± 0.352                    | 0.742 | 1.336 ± 0.062                     | 10.854 ± 0.587                    | 0.792 | 0.935 ± 0.015                     | 14.417 ± 0.167                    | 0.854 |
| E119 | 1.643 ± 0.042                     | 10.150 ± 0.238                    | 0.830 | 1.300 ± 0.040                     | 10.464 ± 0.339                    | 0.828 | 0.893 ± 0.015                     | 14.076 ± 0.132                    | 0.859 |
| C120 | 1.714 ± 0.071                     | 10.007 ± 0.337                    | 0.726 | 1.319 ± 0.069                     | 11.811 ± 0.726                    | 0.806 | 0.942 ± 0.015                     | 13.674 ± 0.533                    | 0.901 |
| V121 | 1.645 ± 0.078                     | 10.583 ± 0.469                    | 0.714 | 1.308 ± 0.058                     | 12.193 ± 0.475                    | 0.793 | 0.953 ± 0.024                     | 14.877 ± 0.217                    | 0.886 |
| M122 | 1.746 ± 0.024                     | 10.193 ± 0.351                    | 0.813 | 1.413 ± 0.024                     | 11.670 ± 0.297                    | 0.832 | 0.972 ± 0.009                     | 14.655 ± 0.242                    | 0.860 |
| N123 | 1.661 ± 0.015                     | 10.237 ± 0.118                    | 0.715 | 1.361 ± 0.042                     | 11.486 ± 0.271                    | 0.787 | 0.959 ± 0.014                     | 14.748 ± 0.185                    | 0.830 |
| N124 | 1.618 ± 0.119                     |                                   | 0.787 | 1.420 ± 0.130                     | 11.896 ± 0.205                    | 0.682 | 1.107 ± 0.101                     |                                   | 0.914 |
| V125 |                                   |                                   |       |                                   |                                   |       |                                   |                                   |       |
| T126 | 1.811 ± 0.103                     | 11.654 ± 0.545                    | 0.886 | 1.279 ± 0.063                     | 11.888 ± 0.584                    | 0.813 | 0.952 ± 0.014                     | 16.546 ± 0.989                    | 0.896 |
| C127 | 1.696 ± 0.055                     | 10.266 ± 0.435                    | 0.854 | 1.362 ± 0.072                     | 11.971 ± 1.036                    | 0.924 | 0.992 ± 0.024                     | 14.958 ± 0.739                    | 0.810 |
| T128 | 1.635 ± 0.045                     | 10.778 ± 0.218                    | 0.817 | 1.271 ± 0.025                     | 11.669 ± 0.289                    | 0.857 | 0.870 ± 0.008                     | 14.866 ± 0.122                    | 0.865 |
| R129 | 1.840 ± 0.048                     | 10.382 ± 0.360                    | 0.730 | 1.328 ± 0.032                     | 12.563 ± 0.473                    | 0.791 | 0.910 ± 0.026                     | 15.573 ± 0.348                    | 0.847 |
| I130 | 1.614 ± 0.038                     | 10.674 ± 0.348                    | 0.804 | 1.251 ± 0.039                     | 12.310 ± 0.251                    | 0.799 | 0.823 ± 0.017                     | 14.639 ± 0.323                    | 0.863 |
| Y131 | 1.651 ± 0.065                     | 9.496 ± 0.353                     | 0.777 | 1.332 ± 0.087                     | 11.353 ± 0.545                    | 0.807 | 0.931 ± 0.024                     | 14.644 ± 0.616                    | 0.883 |
| E132 | 1.692 ± 0.024                     | 10.367 ± 0.171                    | 0.770 | 1.348 ± 0.047                     | 11.582 ± 0.279                    | 0.838 | 0.895 ± 0.013                     | 14.532 ± 0.219                    | 0.847 |
| K133 | 1.790 ± 0.054                     | 9.702 ± 0.289                     | 0.722 | 1.333 ± 0.039                     | 10.965 ± 0.313                    | 0.777 | 0.950 ± 0.024                     | 13.831 ± 0.238                    | 0.833 |
| V134 | 1.683 ± 0.022                     | 9.498 ± 0.162                     | 0.738 | 1.403 ± 0.023                     | 10.730 ± 0.167                    | 0.779 | 0.972 ± 0.016                     | 13.829 ± 0.177                    | 0.809 |
| E135 | 1.508 ± 0.026                     | 8.008 ± 0.221                     | 0.466 | 1.297 ± 0.025                     | 9.428 ± 0.263                     | 0.614 | 0.938 ± 0.009                     | 11.307 ± 0.078                    | 0.605 |
